# Supplementary material for: Decreased Incidence of Pediatric Intussusception during COVID-19
Source: MDPI journal article supplement (doi:10.3390/children8111072), 2021-11-21
Supplement: s1 [file s1]

**Figure S1.** Incidence of COVID-19 in the location of the research institute

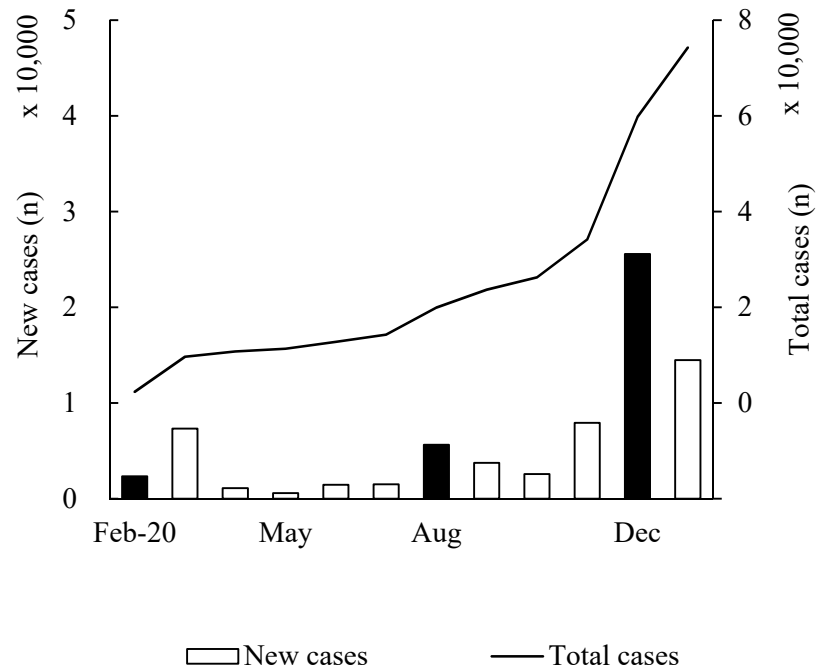

|               | New cases    | Total cases  |
|---------------|--------------|--------------|
| <b>Feb-20</b> | <b>2337</b>  | <b>2337</b>  |
| Mar-20        | 7324         | 9661         |
| Apr-20        | 1100         | 10761        |
| May-20        | 583          | 11344        |
| Jun-20        | 1456         | 12800        |
| Jul-20        | 1505         | 14305        |
| <b>Aug-20</b> | <b>5642</b>  | <b>19947</b> |
| Sep-20        | 3752         | 23699        |
| Oct-20        | 2572         | 26271        |
| Nov-20        | 7930         | 34201        |
| <b>Dec-20</b> | <b>25572</b> | <b>59773</b> |
| Jan-21        | 14489        | 74262        |

Abbreviation: COVID-19, coronavirus disease 2019.

Bold numbers and black bars: outbreaks

Coronavirus Disease-19, Republic of Korea: Korea Disease Control and Prevention Agency; 2021 [Available from: <http://ncov.mohw.go.kr/en>]

**Figure S2.** Poisson log-linear regression of monthly ED visits toward incidence of intussusception.

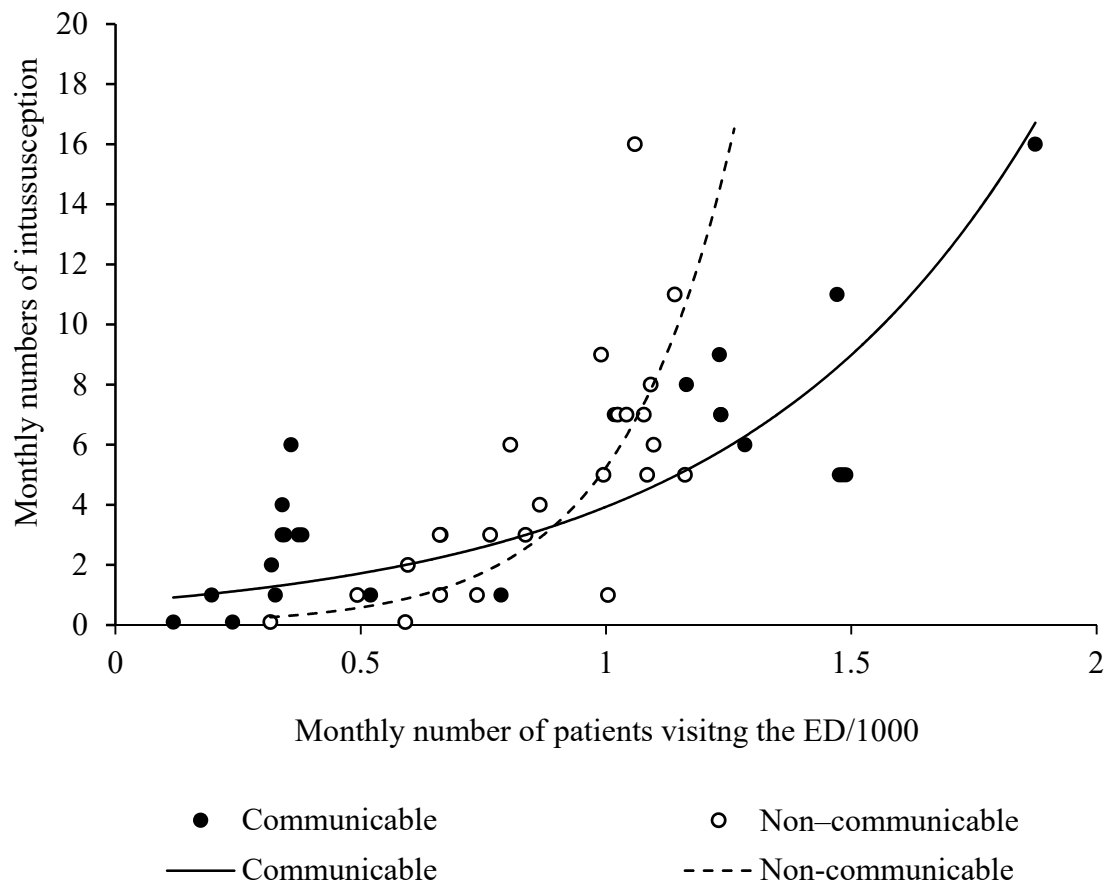

| Variables                      | B    | Odds ratio | 95% CI     | <i>P</i> value |
|--------------------------------|------|------------|------------|----------------|
| Communicable disease/1,000     | 0.76 | 2.15       | 1.08–4.26  | 0.029          |
| Non-communicable disease/1,000 | 1.39 | 4.00       | 0.57–28.02 | 0.163          |
